# Supplementary material for: Evaluation of the Leishmania Inositol Phosphorylceramide Synthase as a Drug Target Using a Chemical and Genetic Approach
Source: PubMed Central journal article supplement (PMC11320567; doi:10.1021/acsinfecdis.4c00284), 2024-07-18
Supplement: id4c00284_si_001.pdf [file id4c00284_si_001.pdf]

**Evaluation of the *Leishmania* inositol phosphorylceramide synthase as a drug target using a chemical and genetic approach**

Edubiel A. Alpizar-Sosa<sup>1#</sup>, Flavia M. Zimbres<sup>1#</sup>, Brian S. Mantilla<sup>1</sup>, Emily A. Dickie<sup>2</sup>  
Wenbin Wei<sup>1</sup>, Gabriela A. Burle-Caldas<sup>1,3</sup>, Laura N. S. Filipe<sup>1</sup>, Katrien Van Bocxlaer<sup>4</sup>,  
Helen P. Price<sup>5</sup>, Ana V. Ibarra-Meneses<sup>6</sup>, Francis Beaudry<sup>7</sup>, Christopher Fernandez-  
Prada<sup>6</sup>, Philip D. Whitfield<sup>2</sup>, Michael P. Barrett<sup>2</sup> and Paul W. Denny\*<sup>1</sup>

<sup>1</sup>*Department of Biosciences, University of Durham, South Road, Durham, DH1 3LE, UK  
email [p.w.denny@durham.ac.uk](mailto:p.w.denny@durham.ac.uk)*

<sup>2</sup>*School of Infection and Immunity, College of Medical, Veterinary and Life Sciences,  
University of Glasgow, Glasgow G12 8TA, UK*

<sup>3</sup>*Departamento de Bioquímica e Imunologia, Universidade Federal de Minas Gerais,  
Caixa Postal 486 - 31270-901, Belo Horizonte, Minas Gerais, Brazil*

<sup>4</sup>*York Biomedical Research Institute, Hull York Medical School, University of York, York  
YO10 5NG, UK*

<sup>5</sup>*School of Life Sciences, Keele University, Staffordshire, ST5 5BG, UK*

<sup>6</sup>*Département de Pathologie et Microbiologie, Faculté de Médecine Vétérinaire,  
Université de Montréal, Saint-Hyacinthe, Quebec J2S 2M2, Canada*

<sup>7</sup>*Département de Biomédecine, Faculté de Médecine Vétérinaire, Université de  
Montréal, Saint-Hyacinthe, Quebec J2S 2M2, Canada*

*#These authors contributed equally to this work*

*\*Corresponding author*

S1

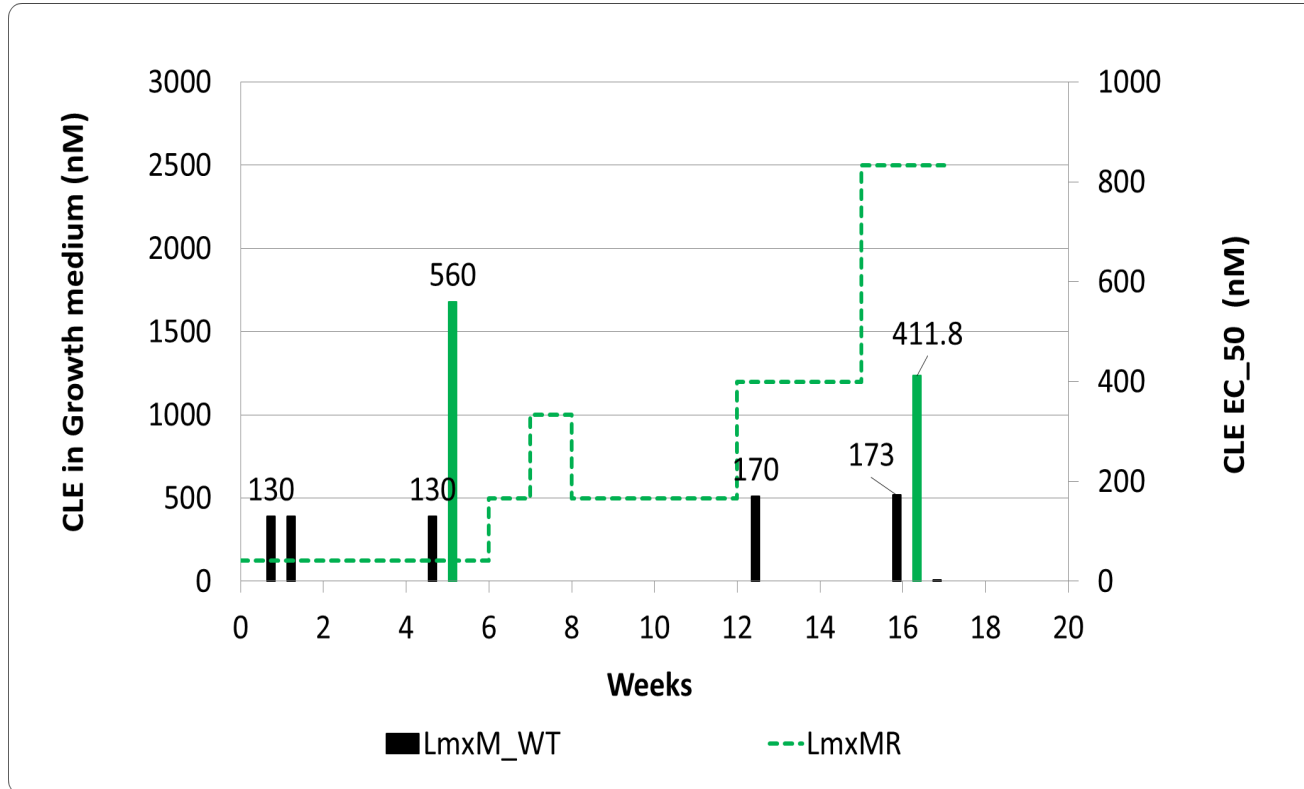

**Figure S1** *In vitro* evolution of drug resistance in *Leishmania mexicana* promastigotes during culture with clemastine fumarate in Schneiders media. Figure shows values for wild type and one resistant clone (LmxM.cl.4). Lefthand *y-axis* shows concentration of clemastine fumarate (CLE) used in selection; righthand *y-axis* shows EC<sub>50</sub> values at each point. Time of treatment in weeks – *x-axis*

S2

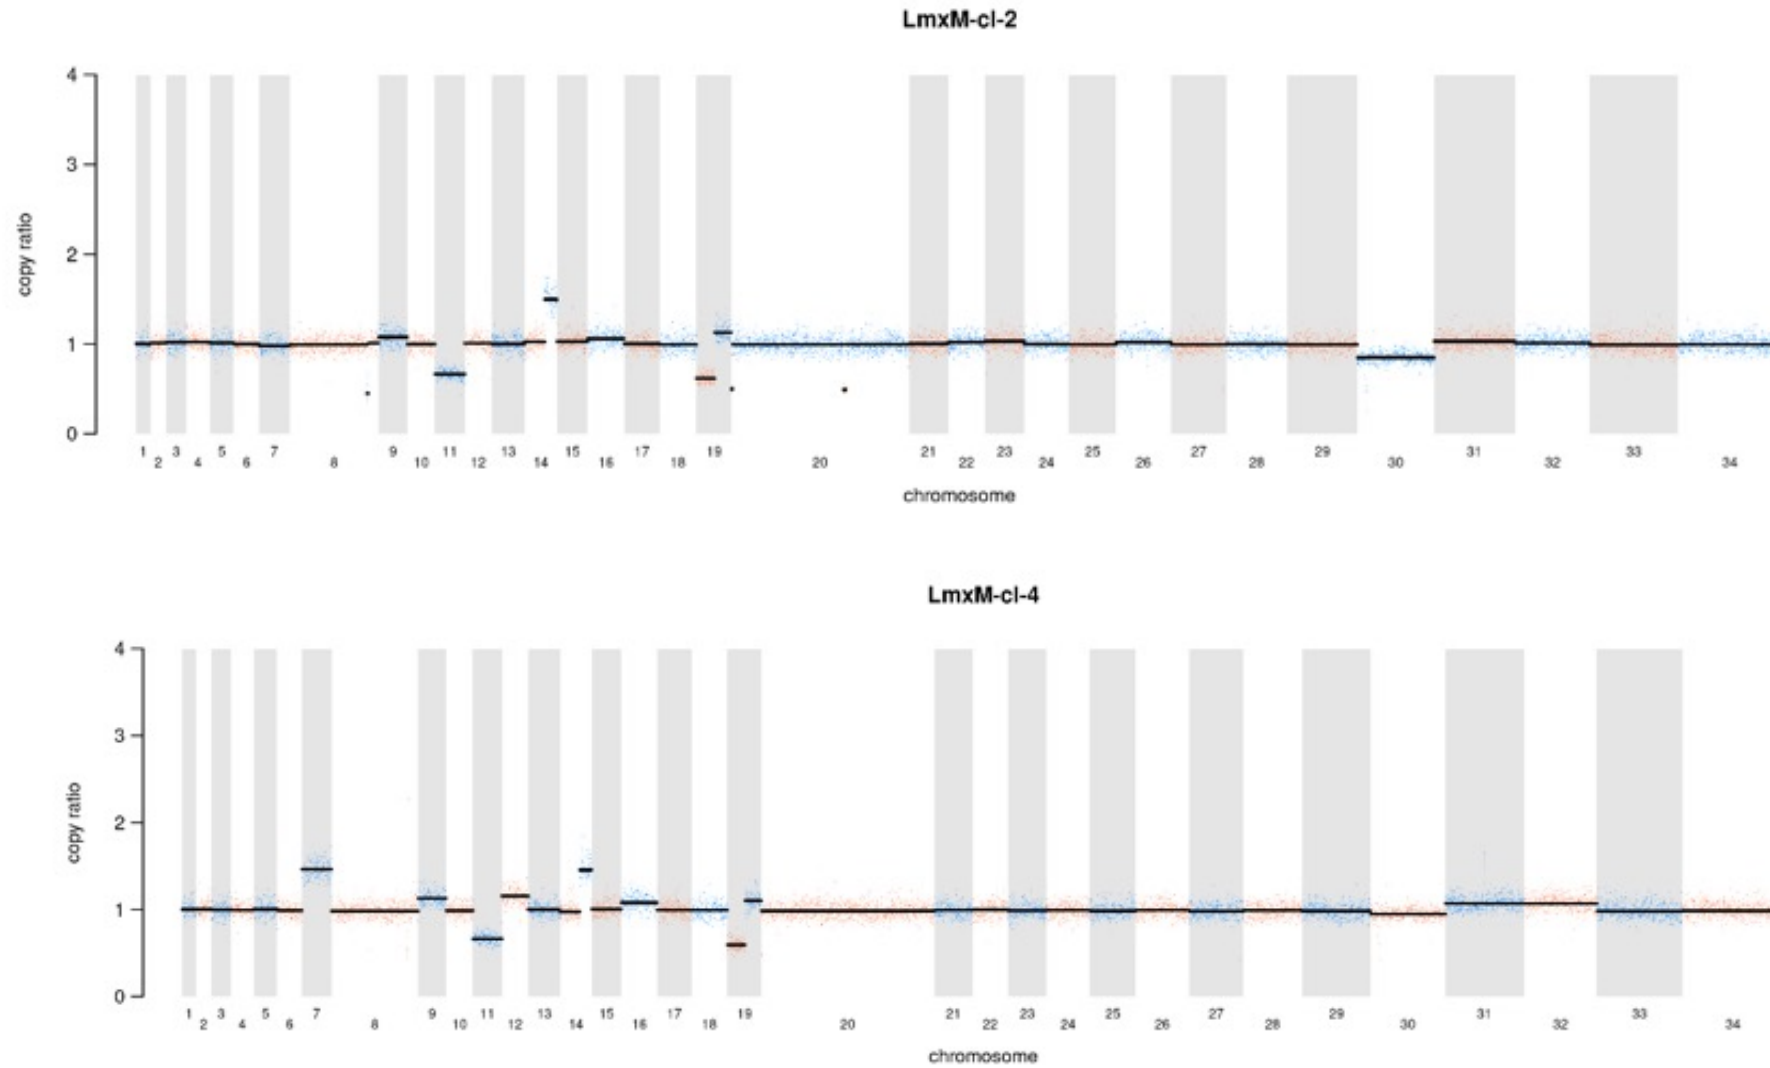

**Figure S2** Chromosomal Copy Number Variation (CNV) analyses of the two independent *in vitro* derived clemastine fumarate resistant clones (Lmx-cl-2 and Lmx-cl-4). Copy number ratio *y-axis*; *Leishmania mexicana* chromosome number *x-axis*

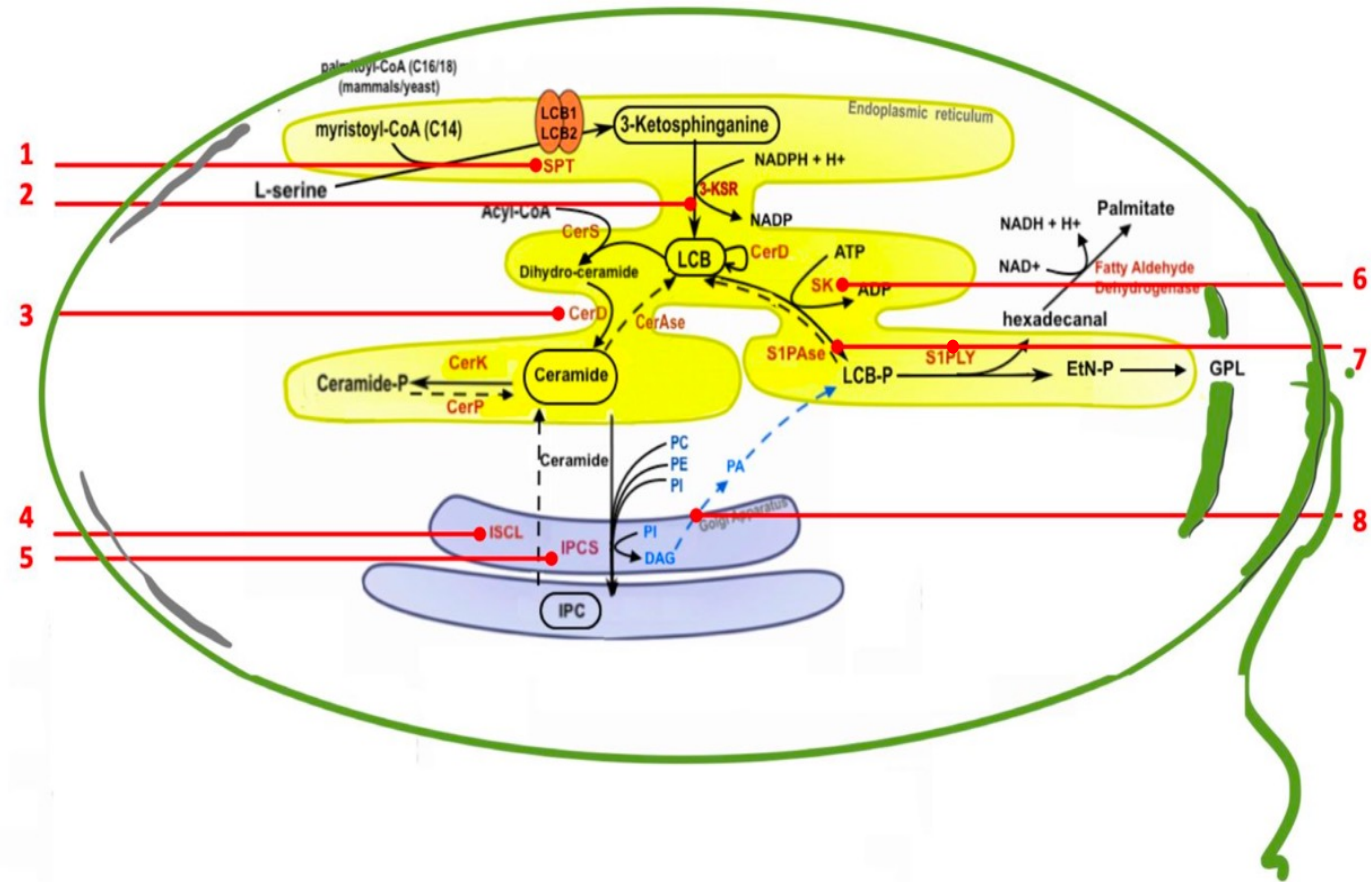

**Figure S3** SNPs identified in genes of the sphingolipid pathway in two CleR individual lines of *L. mexicana* promastigotes. Numbers (red) highlight the genes in which SNPs were found. SPT (1); 3-KSR (2); CerD (3); ISCL (4); IPCS (5); SK (6); S1PAse and S1PLY (7); PAF (8). PC: phosphatidylcholine; PE: phosphatidylethanolamine; PI: phosphatidylinositol; DAG: diacylglycerol. A complete list of the enzyme names and SNPs in each gene is provided in Table S2 and Table S4 respectively.

S4

A

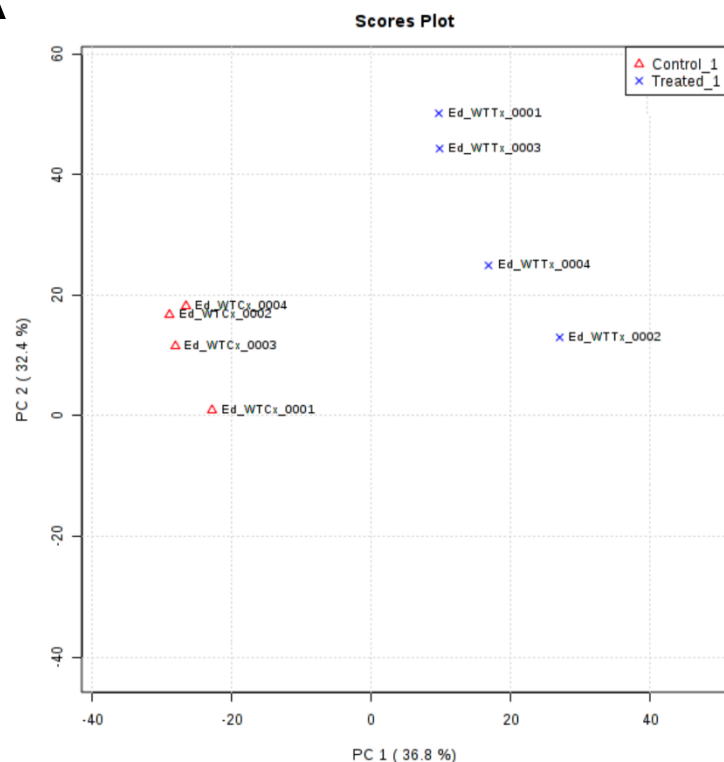

B

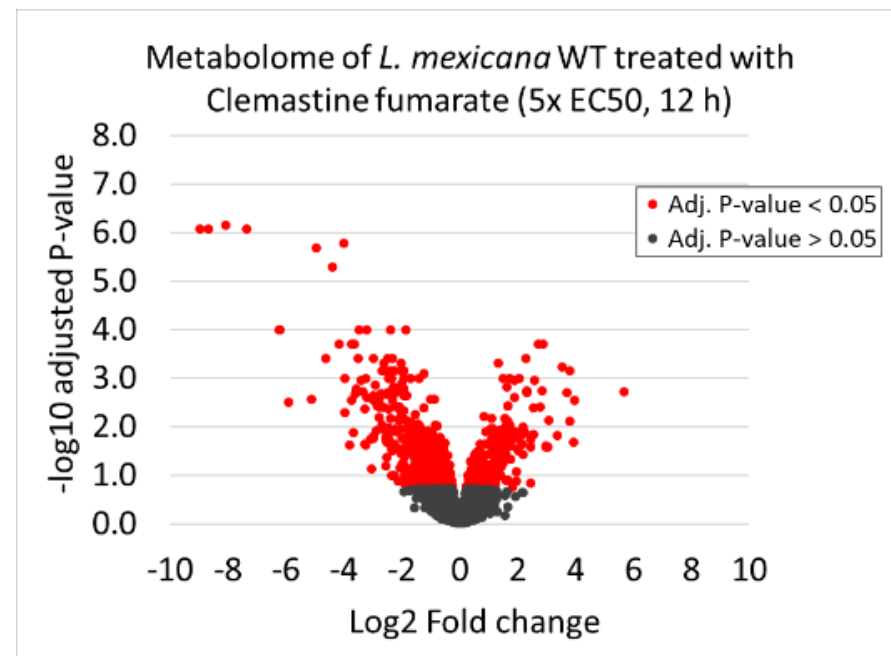

**Figure S4** (A) PCA plot showing the global differences between treated (Treated\_1, blue crosses) and untreated (Control\_1, red triangles) cells. Dots represent biological replicates ( $n=4$ ) of the measured metabolites. Clusters from both groups indicate good reproducibility across the machine run. Principal Components 1 and 2 are shown in  $x$ - and  $y$ -axis, respectively. (B) Volcano plot showing significant ( $n=341$ , red dots) and non-significant ( $n=2,113$ , black dots) log<sub>2</sub> fold-changes of metabolites peaks as detected by LC-MS (untargeted metabolomics) in mid-log wild type *Leishmania mexicana* promastigotes ( $1 \times 10^8$ ) after treatment with clemastine fumarate ( $10 \mu\text{M}$ ) for 12 h. Metabolomics and lipidomics analyses (LCMS) were performed and processed using multivariate data analysis with PiMP pipeline<sup>58</sup>. Note that each metabolite (peak) can also match several peaks, as several different structures with the same empirical formula may elute during the chromatographic separation (i.e. they will have different retention times) or may occur in multiple polarities (i.e. both positive and negative). For this reason, each data point may have more than one peak associated with it.

**S5 A**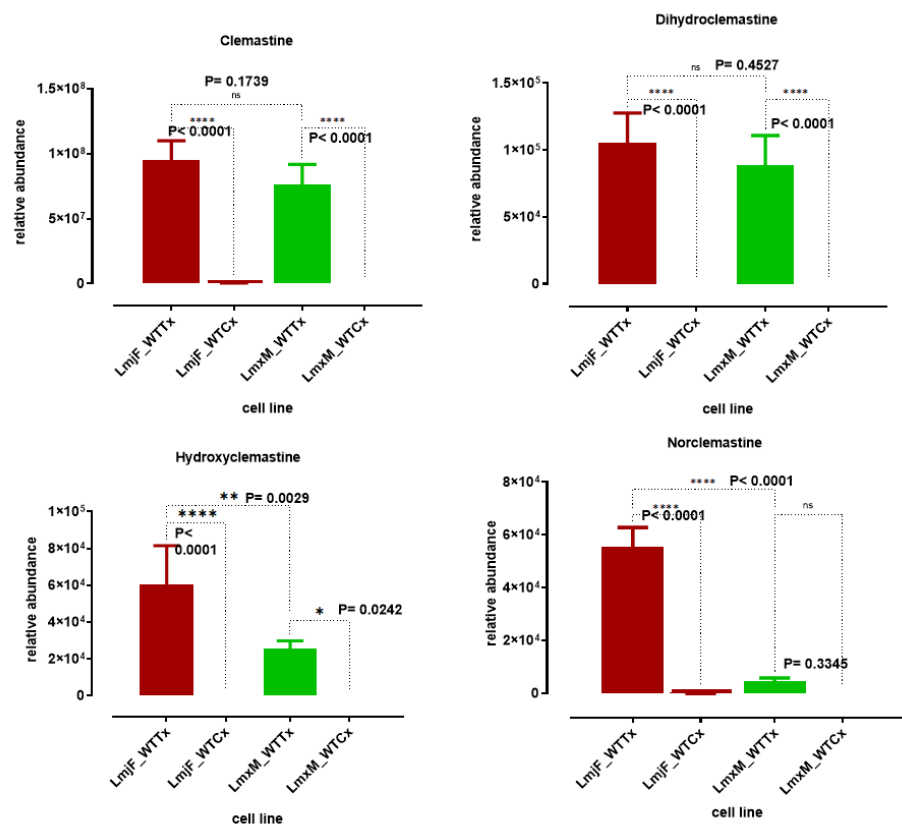**B**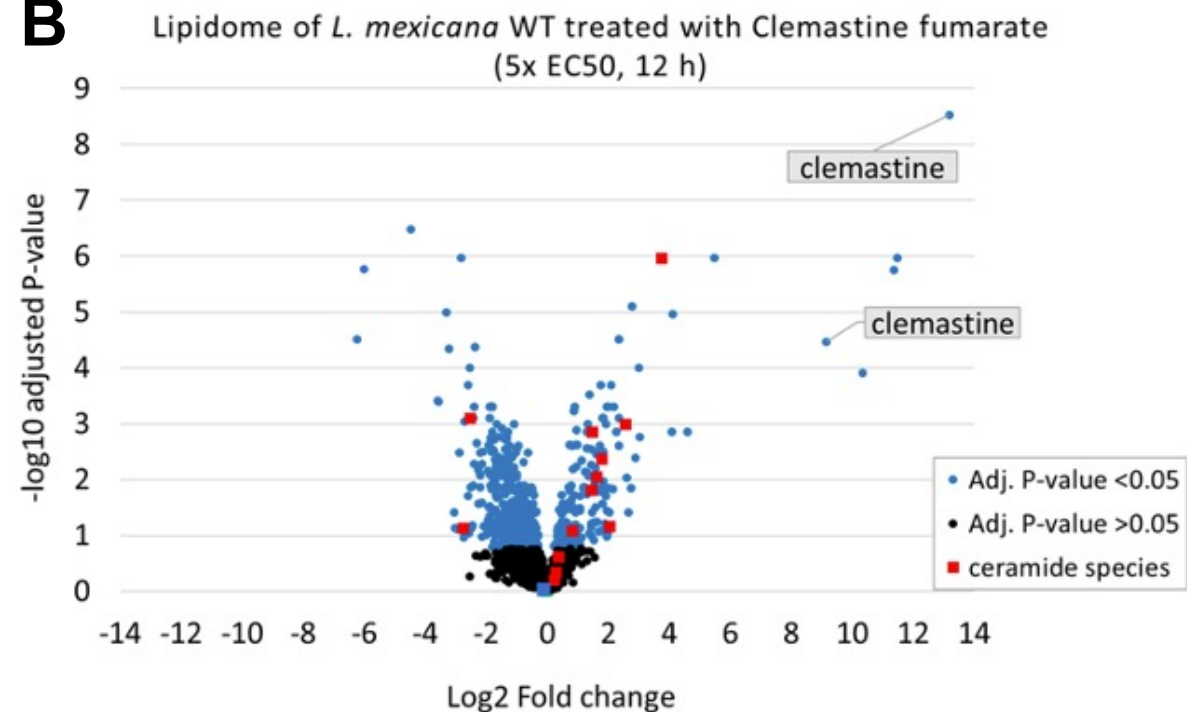

**Figure S5** (A) Relative abundance (*y*-axis) of clemastine sub-metabolites identified in biological replicates (n=4) of treated (WTTx) and untreated parasites (WTCx) (*x*-axis). Metabolomics and lipidomics analyses (LCMS) were performed and processed using multivariate data analysis with PiMP pipeline<sup>58</sup>. The Benjamini-Hochberg procedure adjusted raw *P*-values (*q*-values) < 0.05 for ANOVA. Differences among samples (WTTx vs WTCx) were evaluated using one-way ANOVA with the Tukey's multiple comparisons test (*P*-value < 0.05) using Prism software version 9.3.0. Statistically significant values (*P* < 0.05, 95% confidence interval) are shown with stars: ns, nonsignificant; \**P* ≤ 0.05; \*\**P* ≤ 0.01; \*\*\**P* ≤ 0.001; \*\*\*\**P* ≤ 0.0001). See Materials and Methods for details. Changes in other isomers peaks and the global metabolome are provided in Table S6. Reference values of clemastine fumarate and metabolites are from Tevell et al. 2010<sup>59</sup>. (B) Volcano plot showing significant (n= 314, blue dots) and non-significant (n= 1,720, black dots) log<sub>2</sub> fold-changes of putative peaks as detected by LC-MS (targeted, lipidomics) in promastigotes after exposure to clemastine fumarate. Ceramides species are shown (red dots).

**S6**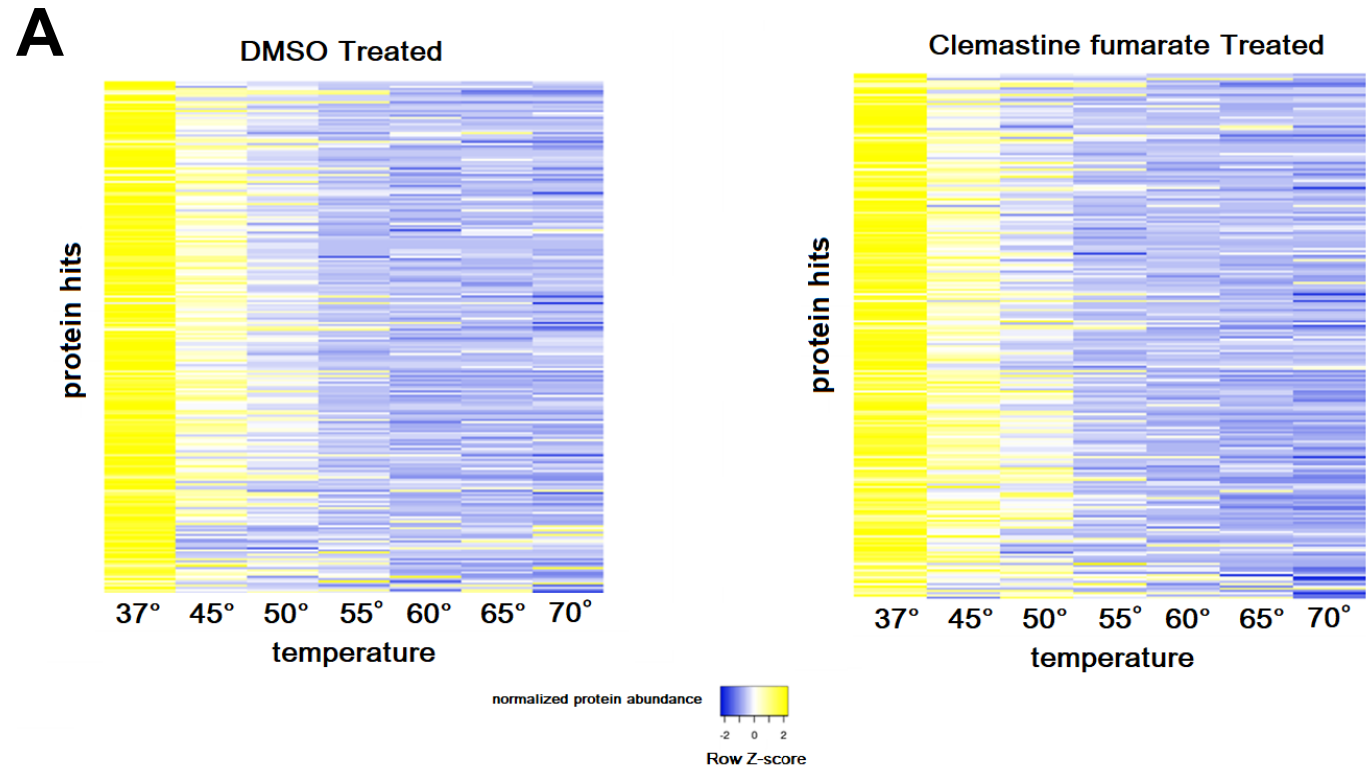

**Figure S6** Heat map illustrating the thermal stability of soluble protein cell extracts from *Leishmania mexicana*. A) The normalized protein abundance of *L. mexicana* WT protein hits (*y*-axis), accompanied by full melting curves at seven different temperatures (*x*-axis) in the presence of DMSO (control, left panel) and clemastine fumarate at 100  $\mu$ M (treatment, right panel). B) Melting curves of some of the most interesting hits are provided. See Table S5 for a full list of protein hits detected in wild type *L. mexicana* using Thermal Proteomics Profiling (TPP).

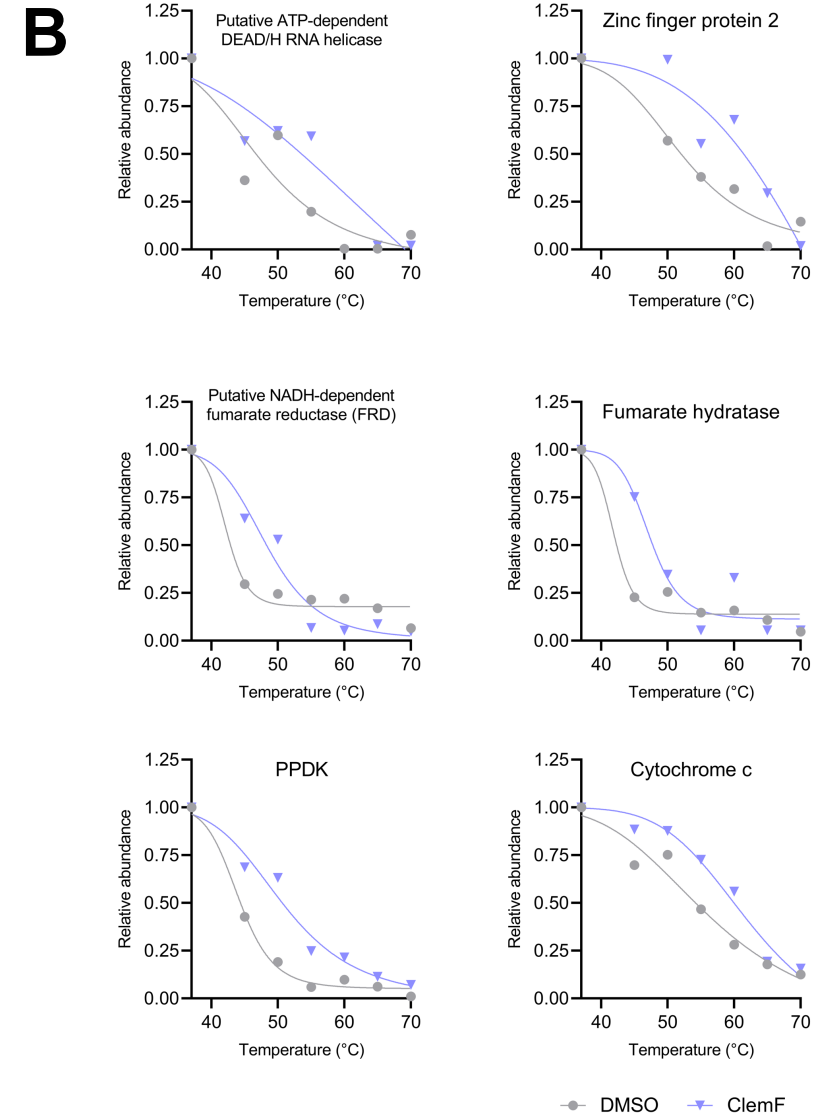

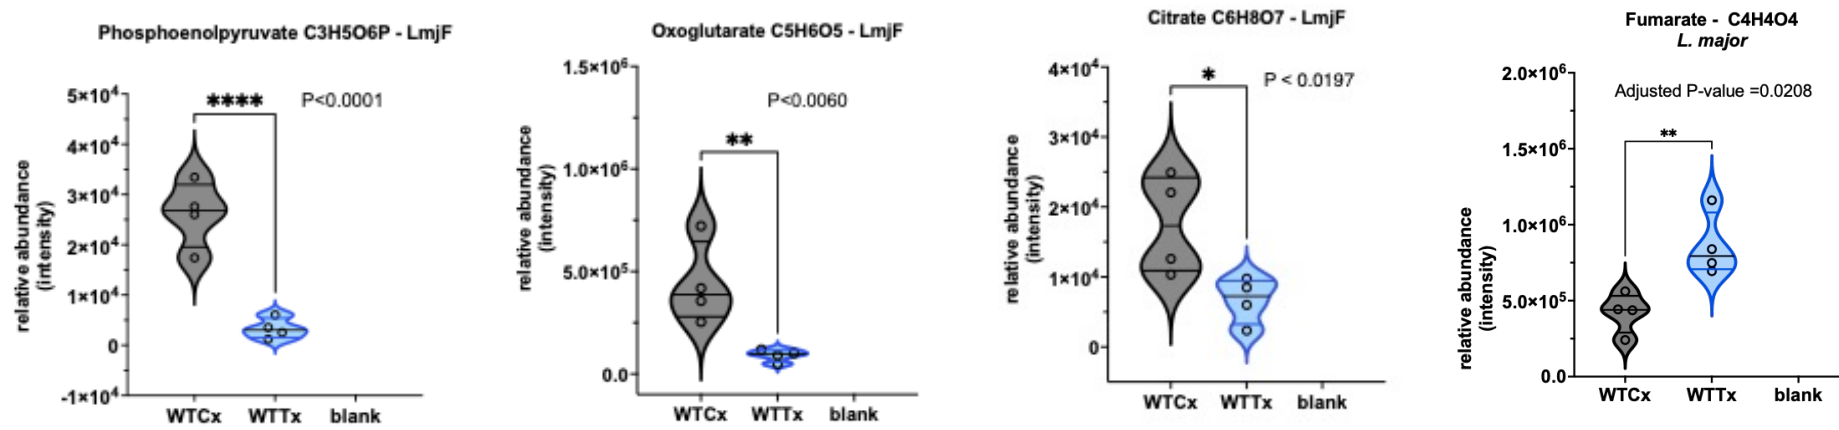

**Figure S7** Relative abundance ( $y$ -axis) of TCA cycle metabolites identified in wild type *Leishmania major* promastigotes after clemastine fumarate (10  $\mu$ M) exposure for 12 h. Biological replicates ( $n=4$ ) of treated (WTTx) and untreated parasites (WTCx) ( $x$ -axis) were analysed with LCMS and processed using multivariate data analysis with PiMP pipeline<sup>58</sup>. The Benjamini-Hochberg procedure adjusted raw  $P$ -values ( $q$ -values)  $< 0.05$  for ANOVA. Differences among samples (WTTx vs WTCx) were evaluated using one-way ANOVA with the Tukey's multiple comparisons test ( $P$ -value  $< 0.05$ ) using Prism software version 9.3.0. Statistically significant values (95% confidence interval) are shown with stars: ns, nonsignificant; \* $p \leq 0.05$ ; \*\* $p \leq 0.01$ ; \*\*\* $p \leq 0.001$ ; \*\*\*\* $p \leq 0.0001$ ). Changes in other metabolites are provided in Table S6.



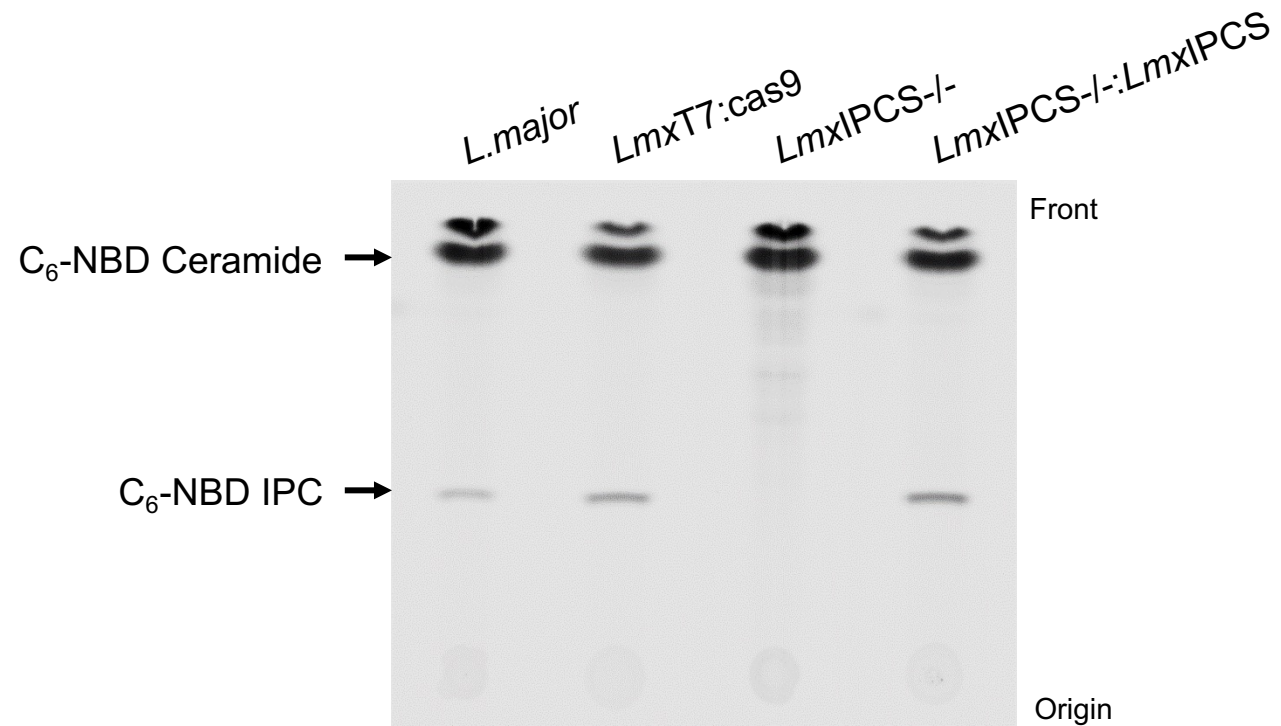

**Figure S8** Enzymatic activity in *Leishmania mexicana* cell lines. Procyclic promastigotes were incubated with fluorescent ceramide (C<sub>6</sub>-NBD Ceramide), followed by lipid extraction and analyses by TLC plate. The *LmxIPCS-/-* mutant did not produce IPC, and this metabolic profile was restored upon reconstitution of the IPCS gene in the add-back line (*LmxIPCS-/-:LmxIPCS*). The *L. mexicana* parental line (*LmxT7:Cas9*) and *L. major* FV1 were used as controls.

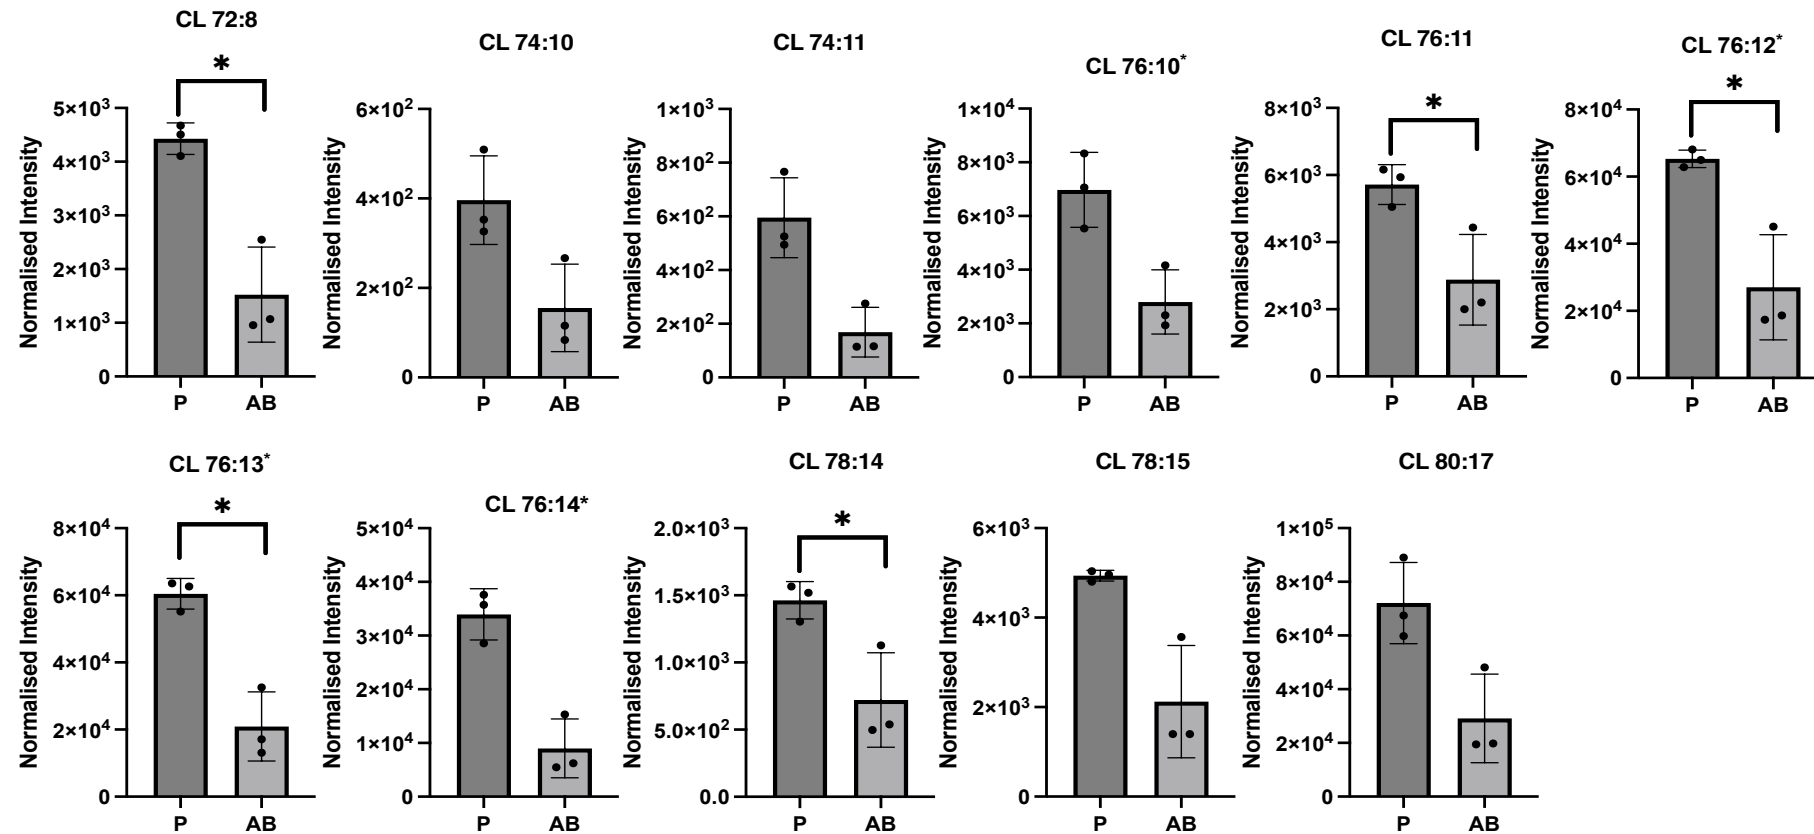

**Figure S9** LC-MS analyses demonstrated diminution of cardiolipins (CL) following add back. Differences between samples parental (*LmxT7:Cas9*; P) and add back (*LmxIPCS<sup>-/-</sup>:LmxIPCS*; AB) were evaluated using paired *t* tests in Prism software version 9.3.0. Statistically significant values are shown with stars:  $*p \leq 0.05$ . All data captured in the negation ion mode expect those with superscript asterisk which were captured in the positive ion mode.

**Table S1** Variants identified in two individual clones (LmxMcl.2 and LmxMcl.4) of clemastine resistant *Leishmania mexicana* promastigotes. IG: intergenic region (non-coding transcripts or splice region variants); CDS: coding sequence (missense or non-synonymous, silent (synonymous), start/stop lost/gained variants); AF: allele frequency.

| <b>Clones</b> | <b>LmxMcl.2</b> | <b>AF</b> | <b>LmxMcl.4</b> | <b>AF</b> | <b>Total</b> |
|---------------|-----------------|-----------|-----------------|-----------|--------------|
| IG            | 13,152          | 0.02-1.0  | 12,892          | 0.02-1.0  | 26,044       |
| (%)           | 44.24           |           | 43.36           |           | 87.61        |
| CDS           | 1,932           | 0.02-0.67 | 1,750           | 0.02-0.73 | 3,682        |
| (%)           | 6.49            |           | 5.88            |           | 12.38        |
| Missense      | 1,582           | 0.02-0.67 | 1,425           | 0.02-0.73 | 3,007        |
| (%)           | 5.32            |           | 4.79            |           | 10.11        |
| Silent        | 349             | 0.03-0.67 | 322             | 0.02-0.53 | 671          |
| (%)           | 1.17            |           | 1.08            |           | 2.25         |
| TOTAL (n)     | 15,084          | 0.02-1.0  | 14,642          | 0.02-1.0  | 29,726       |
| (%)           | 50.73           |           | 49.23           |           | 99.97        |

# S11

**Table S2** Polymorphisms found in genes involved in the sphingolipid pathway in two CleR-*Leishmania mexicana* clones. Missense (non-synonymous) and silent SNPs in coding regions (CDS) are indicated with one (\*) and two stars (\*\*), respectively. Other SNPs correspond intergenic regions. Genes IDs are from the TritrypDB. SPT: serine palmitoyltransferase; 3-KSR: 3-dehydrosphinganine reductase; CerS: ceramide synthase; CerD: sphingolipid 4-desaturase; CerA: ceramidase; IPCS: inositol phosphorylceramide synthase; ISCL: inositol phosphosphingolipid phospholipase C; CerK: ceramide kinase; CerP: ceramide phosphatase; SK: sphingosine kinase; S1PAse: sphingosine-1-phosphate phosphatase; S1PLY: sphingosine 1-phosphate lyase; PAF: phosphatidic acid phosphatase. ND: non-determined. Numbered to map to Figure S3. Full details are shown in Figure S4.

| Gene ID      | Alias        | <i>L. mexicana</i> clone |           | Total of variants | Total of missense SNPs |   |
|--------------|--------------|--------------------------|-----------|-------------------|------------------------|---|
|              |              | cl.2                     | cl.4      |                   |                        |   |
| 1            | LmxM.33.3740 | SPT-like (LCB1)          | 1         | 2 / 1*            | 4                      | 1 |
| 1            | LmxM.34.0320 | SPT (LCB2)               |           | 1**/ 1*           | 2                      | 1 |
| 2            | LmxM.34.0330 | 3-KDS                    | 1         | 2                 | 3                      |   |
|              | LmxM.30.1780 | CerS (DHCS)              |           |                   |                        |   |
| 3            | LmxM.26.1670 | CerD (SLDS)              |           |                   |                        |   |
| 3            | LmxM.26.1700 | CerD (SLDS)              |           | 1                 | 1                      |   |
| 3            | LmxM.26.1690 | CerD (SLDS)              |           |                   |                        |   |
|              | ND           | CerA                     |           |                   |                        |   |
| 4            | LmxM.08.0200 | ISCL                     | 2         | 1 / 1*            | 3                      | 1 |
| 5            | LmxM.34.4990 | IPCS                     | 1         | 2                 | 3                      |   |
|              | ND           | CerK                     |           |                   |                        |   |
|              | ND           | CerP                     |           |                   |                        |   |
| 6            | LmxM.26.0710 | SK                       | 1         | 1                 | 2                      | 2 |
| 7            | LmxM.31.2290 | S1PAse                   | 1**/ 1*   | 2*                | 4                      | 3 |
| 7            | LmxM.29.2350 | S1PLY                    | 1         | 2                 | 3                      |   |
| 8            | LmxM.18.0440 | PAF                      | 2         | 3                 | 5                      | 1 |
| <b>TOTAL</b> | <b>Total</b> | <b>11</b>                | <b>19</b> | <b>30</b>         | <b>9</b>               |   |

**Table S3** Miltefosine and amphotericin B sensitivity of *Leishmania mexicana* parental (*LmxT7:Cas9*), *LmxIPCS* null (*LmxIPCS*<sup>-/-</sup>) and *LmxIPCS* addback (*LmxIPCS*<sup>-/-</sup>:*LmxIPCS*) lines.

EC<sub>50</sub> values shown in  $\mu\text{M}$  with 95% confidence intervals.

|                                                    | Miltefosine      | Amphotericin B  |
|----------------------------------------------------|------------------|-----------------|
| <b><i>LmxT7:cas9</i></b>                           | 7.88 $\pm$ 0.34  | 0.31 $\pm$ 0.07 |
| <b><i>LmxIPCS</i><sup>-/-</sup></b>                | 15.24 $\pm$ 1.03 | 0.13 $\pm$ 0.03 |
| <b><i>LmxIPCS</i><sup>-/-</sup>:<i>LmxIPCS</i></b> | 7.17 $\pm$ 0.27  | 0.37 $\pm$ 0.09 |

**Table S4** Excel file detailing identified mutations associated with clemastine fumarate pressure

**Table S5** Proteins detected in *Leishmania mexicana* subjected to clemastine fumarate treatment or untreated, revealing marked changes due to significant temperature variation  $\geq 4^{\circ}\text{C}$ .

| Accession | Gene ID<br><i>L. mexicana</i> | Description                                                                                        | $Tm_{50}$ ( $^{\circ}\text{C}$ ) |       | $\Delta Tm$ ( $^{\circ}\text{C}$ ) |
|-----------|-------------------------------|----------------------------------------------------------------------------------------------------|----------------------------------|-------|------------------------------------|
|           |                               |                                                                                                    | Clem                             | DMSO  |                                    |
| E9AU29    | LmxM.36.5940                  | A distinct subfamily of CDD/CDA-like deaminases protein                                            | 64.32                            | 37.96 | 26.36                              |
| E9AYZ0    | LmxM.27.0880                  | Putative 2-oxoglutarate dehydrogenase subunit (OGDC)<br>(or $\alpha$ -ketoglutarate dehydrogenase) | 69.97                            | 47.08 | 22.89                              |
| E9AZC6    | LmxM.27.2200                  | Thioredoxin domain-containing protein                                                              | 68.79                            | 55.13 | 13.66                              |
| E9AL45    | LmxM.07.0340                  | Putative ATP-dependent DEAD/H RNA helicase                                                         | 59.21                            | 46.69 | 12.52                              |
| E8NHP1    | LmxM.15.0440a                 | tb-292 membrane associated protein-like protein                                                    | 50.00                            | 37.78 | 12.22                              |
| E9AYR5    | LmxM.27.0130                  | Zinc finger protein 2                                                                              | 61.25                            | 50.19 | 11.06                              |
| E9B5Z7    | LmxM.34.1180                  | Putative NADH-dependent fumarate reductase (FRD)                                                   | 48.3                             | 38.38 | 9.92                               |
| E9B2E4    | LmxM.31.0230                  | Dynein light chain, flagellar outer arm, putative                                                  | 64.4                             | 55.78 | 8.62                               |
| E9AKM1    | LmxM.05.1140                  | V-type proton ATPase subunit                                                                       | 50.21                            | 41.6  | 8.61                               |
| E9ALJ4    | LmxM.08.29.2300               | Ubiquitin carboxyl-terminal hydrolase                                                              | 46.16                            | 37.72 | 8.44                               |
| E9AU79    | LmxM.36.6430                  | Protein transport protein SEC23                                                                    | 45.06                            | 37.27 | 7.79                               |
| E9B686    | LmxM.34.2080                  | Putative calcium motive P-type ATPase                                                              | 51.75                            | 44.2  | 7.55                               |
| E9B2L9    | LmxM.31.0950                  | Staphylococcal nuclease homologue/Tudor domain<br>containing protein, putative                     | 45.37                            | 37.99 | 7.38                               |
| E9AV49    | LmxM.21.0810                  | methionine-tRNA ligase                                                                             | 44.68                            | 37.35 | 7.33                               |
| E9B1Q4    | LmxM.30.1070                  | Biotin/lipoate protein ligase-like protein                                                         | 44.45                            | 37.79 | 6.66                               |
| E9B2L2    | LmxM.31.0880                  | 60S ribosomal protein L18a                                                                         | 44.96                            | 38.39 | 6.57                               |
| E9AVS1    | LmxM.22.0890                  | Uncharacterized protein                                                                            | 44.51                            | 37.97 | 6.54                               |
| E9B384    | LmxM.31.3010                  | AMPK1_CBM domain-containing protein                                                                | 49.7                             | 43.3  | 6.40                               |
| E9AKF1    | LmxM.05.0450                  | SKP1 component POZ domain-containing protein                                                       | 44.39                            | 38.01 | 6.38                               |
| E9ALK7    | LmxM.08.29.2160               | Rab GDP dissociation inhibitor                                                                     | 50.01                            | 43.65 | 6.36                               |
| E9ATB8    | LmxM.36.3390                  | 60S ribosomal protein L29                                                                          | 44.83                            | 38.48 | 6.35                               |
| E9ANG7    | LmxM.11.0210                  | Inorganic diphosphatase                                                                            | 44.76                            | 38.43 | 6.33                               |
| E9AV01    | LmxM.21.0340                  | Mitochondrial processing peptidase alpha subunit, putative                                         | 44.71                            | 38.42 | 6.29                               |
| E9ANC1    | LmxM.10.1110                  | LsmAD domain-containing protein                                                                    | 54.74                            | 48.53 | 6.21                               |
| E9AWM1    | LmxM.24.0320                  | fumarate hydratase (FH)                                                                            | 47.76                            | 41.72 | 6.04                               |
| E9B396    | LmxM.31.3130                  | Putative ribosomal protein L3                                                                      | 49.72                            | 43.71 | 6.01                               |
| E9AKM7    | LmxM.05.1210                  | Protein phosphatase type 1 regulator-like protein                                                  | 48.66                            | 42.65 | 6.01                               |
| E9AZ73    | LmxM.27.1710                  | Putative eukaryotic translation release factor                                                     | 55.44                            | 49.53 | 5.91                               |
| E9AYL4    | LmxM.26.2330                  | Putative 60S ribosomal protein L35                                                                 | 50.62                            | 45.00 | 5.62                               |
| E9ANP4    | LmxM.11.1000                  | Pyruvate, phosphate dikinase (PPDK)                                                                | 49.94                            | 44.37 | 5.57                               |
| E9B5X5    | LmxM.34.0950                  | PSP1 C-terminal domain-containing protein                                                          | 42.88                            | 37.35 | 5.53                               |
| E9ALB7    | LmxM.07.1000                  | RNA binding protein-like protein                                                                   | 61.68                            | 56.51 | 5.17                               |
| E9AQU2    | LmxM.16.1310                  | Putative cytochrome c                                                                              | 59.16                            | 54.2  | 4.96                               |
| E9AKT6    | LmxM.06.0570                  | Putative 60S ribosomal protein L23a                                                                | 48.64                            | 44.28 | 4.36                               |
| E9AKP0    | LmxM.06.0120                  | Peptidyl-prolyl cis-trans isomerase                                                                | 52.11                            | 47.76 | 4.35                               |
| E9ASX8    | LmxM.36.2030                  | Chaperonin HSP60, mitochondrial                                                                    | 55.99                            | 51.68 | 4.31                               |
| E9AW54    | LmxM.23.0510                  | Uncharacterized protein                                                                            | 54.42                            | 50.18 | 4.24                               |
| E9AVW5    | LmxM.22.1330                  | Uncharacterized protein                                                                            | 50.07                            | 45.95 | 4.12                               |
| E9AK27    | LmxM.04.0460                  | Adenylosuccinate lyase                                                                             | 42.27                            | 38.19 | 4.08                               |
| E9AKR5    | LmxM.06.0370                  | Putative glutamine synthetase                                                                      | 41.58                            | 37.5  | 4.08                               |
| E9B1G2    | LmxM.30.0140                  | Ubiquitin carboxyl-terminal hydrolase                                                              | 49.84                            | 45.83 | 4.01                               |

**Table S6** Excel file detailing LCMS data from the metabolomic analyses
